# Supplementary material
Source: HighWire-hosted journal article supplement (https://jmg.bmj.com/content/56/7/462)
Supplement: inline-supplementary-material-4 [file inline-supplementary-material-4.xlsx]

## Sheet: Sheet1
Supplementary Table 2. Mutations in DS cases
Case	Germline Mutation	Somatic Mutation 1	Somatic Mutation 2	Additional Somatic Mutation(s)	Absent IHC stain	MSI-high	Age at dx	PREMM5	Amsterdam II	Revised Bethesda
Iceland 1022	None	PMS2 exon 11 homozygous deletion	PMS2 LOH	MSH6 c.3261dup, p.F1088Lfs*5; MSH6 c.3312dup, p.G1105Wfs*3	PMS2	Yes	42	14.5	No	Yes
Iceland 197	None	MLH1 c.493del, p.A165Lfs*2	MLH1 LOH	MSH6 c.3312delT, p.F1104Lfs*11; PMS2 c.1239delA, p.D414Tfs*34	MLH1/PMS2	Yes	45	3.5	No	Yes
Iceland 1049	None	MSH2 c.942+3A>T	MSH2 LOH		MSH2/MSH6	Yes	54	8.2	Yes	Yes
Iceland 237	None	MLH1 c.2237del, p.L746Rfs*37	MLH1 LOH		MLH1/PMS2	Yes	57	4.4	No	No
Iceland 466	None	MLH1 c.1684C>T, p.Q562*	MLH1 LOH	PMS2 c.1454C>A, p.T485K	MLH1/PMS2	Yes	57	1.7	No	Yes
Iceland 1141	None	MLH1 c.2206G>T, p.E736*	MLH1 LOH		MLH1/PMS2	Yes	57	5	No	No
Iceland 1231	None	PMS2 c.325delG, p.E109Kfs*3	PMS2 c.444delC, p.Y149Tfs*52; c.903+1G>A	MSH6 c.3254delC, p.T1085fs	PMS2	Yes	61	1.7	No	No
Iceland 985	None	MLH1 c.588del, p.K196Nfs*6	MLH1 c.171del, p.K57Nfs*2; c.299G>A, p.R100Q		MLH1/PMS2	Yes	65	3.3	No	Yes
Iceland 246	None	MSH2 c.545_552del, p.D182Vfs*4	MSH2 c.1661+1G>A		MSH2/MSH6	Yes	73	1.8	No	No
Iceland 745	None	MLH1 c.1783_1784del, p.S595Wfs*14	MLH1 LOH		MLH1/PMS2	Yes	79	2.2	No	Yes
Iceland 951	None	MSH2 c.425C>G, p.S142*	MSH2 c.942+3A>T	MSH6 c.3261del, p.F1088Lfs*5; MSH6 c.3556+5del	MSH2/MSH6	Yes	79	3.8	No	Yes
Iceland 1034	None	MLH1 c.2142G>A, p.W714*	MLH1 c.670_673dup, p.R226*	MSH6 c.3261dup, p.F1088Lfs*5	MLH1/PMS2	Yes	79	1.9	No	No
Iceland 509	None	MSH2 inversion	MSH2 LOH		MSH6	No	79	1.6	No	No
Iceland 1082	None	MSH2 c.82del, p.E28Rfs*36	MSH2 c.1310del, p.V437Gfs*17		MSH2/MSH6	Yes	80	3.4	No	Yes
Iceland 506	None	MLH1 c.199G>A, p.G67R	MLH1 LOH		MLH1/PMS2	Yes	82	1	No	Yes
Iceland 959	None	MSH2 c.2459-2A>C	MSH2 c.2352del, p.H785Mfs*27	PMS2 c.1239delA, p.D414Tfs*34	MSH2/MSH6	Yes	88	1.1	No	Yes
Ohio 409149	PMS2 c.319C>T, p.R107W	MSH6 c.3128del, p.N1043Ifs*9	MSH6 c.3260_3261dup, p.L1088Pfs*3	PMS2 c.939T>A, p.Y313X	MSH6	Yes	63	1.6	No	No
Ohio 501039	MSH6 VUS c.3607C>A, p.H1203N	MLH1 c.1615del, p.A539Pfs*52	MLH1 LOH	MSH6 c.2561_2563del, p.K854del, MSH6 c.3261del, p.F1088Sfs*2	MLH1/PMS2	Yes	50	4.8	No	Yes
Ohio 460181	MSH2 VUS c.2417C>T, p.T806I	MLH1 c.2136G>A, p.W712X	MLH1 c.122A>T, p.D41V		MLH1 (equivocal)/PMS2	Yes	65	2.3	No	No
Ohio 452914	GALNT12 c.907G>A, p.D303N	MLH1 c.670_671del, p.V224X	MLH1 LOH		MLH1/PMS2	Yes	64	2.4	No	No
Ohio 502962	None	MLH1 c.677G>A, p.R226Q	MLH1 LOH		MLH1/PMS2	Yes	47	6.2	No	Yes
Ohio 501219	TP53 VUS c.467G>A, p.R156H	MLH1 c.1731G>A, p.S577X	MLH1 LOH		MLH1/PMS2	Yes	45	3.7	No	Yes
Ohio 509479	CHEK2 c.470T>C, p.I157T	MSH2 c.1861C>T, p.R621X	MSH2 c.687del, p.A230Lfs*16	MSH2 c.2005+1G>C	MSH2/MSH6	Yes	55	2	No	Yes
Ohio 404308	None	MLH1 c.2059C>T, p.R687W	MLH1 c.116+1G>A		MLH1/PMS2	Yes	84	1.2	No	No
Ohio 367160	None	MLH1 c.390C>G, p.Y130X	MLH1 LOH		MLH1/PMS2	Yes	78	1	No	No
Ohio 509481	POT1 c.1164-1G>A	MLH1 exons 3-8 deletion	MLH1 LOH		MLH1	Yes	63	1.5	No	No
Ohio 362933	None	MLH1 c.790+5 G>A	MLH1 LOH	MSH6 c.3261dupC, p.F1088Lfs*5	MLH1/PMS2	Yes	37	6.5	No	Yes
Ohio 362938	Biallelic MUTYH c.1187G>A, p.G396D; c.698G>A, p.G233D	MLH1 c.2135G>A, p.W712X	MLH1 c.2041G>A, p.A681T	MSH6 c.3261dupC, p.F1088Lfs*5	MLH1 (weak)/PMS2	Yes	39	7.4	No	Yes
Ohio 509812	None	MSH2 c.2038C>T, p.R680X	MSH2 LOH		MSH2	Yes	61	3.1	No	No
Ohio 426745	None	MLH1 c.439G>A, p.G147R	MLH1 LOH		MLH1/PMS2	Yes	45	6	Yes	Yes
Ohio 502202	None	MLH1 c.1785dup, p.G596Wfs*14	MLH1 LOH		MLH1/PMS2	Yes	42	8.9	No	Yes
Ohio 426486	None	MLH1 c.199G>A, p.G67R	MLH1 LOH	MSH2 c.1088T>C, p.V363A	MLH1 (weak)/PMS2 (weak)	Yes	61	8.1	No	No
Ohio 504509	None	MSH6 c.2690del, p.N897Ifs*9	MSH6 c.2561_2563del, p.K854del	MSH6 c.3621dup, p.F1088L*fs*5	MLH1/PMS2/MSH61	Yes	62	1.6	No	No
Ohio 451318	None	MLH1 c.199G>A, p.G67R	MLH1 LOH		MLH1/PMS2	Yes	96	1.5	No	No
Ohio 432429	None	MLH1 c.678-1G>A	MLH1 LOH		MLH1/PMS2	Yes	71	1.9	No	No
Ohio 443270	None	MSH2 c.1390G>T, p.E464X	MSH2 421bp deletion at intron 2 exon 3 boundary	PMS2 c.281A>T, p.E94V	MSH2/MSH6	Yes	54	2.1	No	Yes
Ohio 400305	None	MLH1 c.402delA, p.K134Nfs*2	MLH1 LOH	MLH1 c.469delT, p.Y157Tfs*3	MLH1/PMS2	Yes	61	11.1	No	Yes
Ohio 400308	None	MLH1 c.1646T>C, p.L549P	MLH1 LOH	MLH1 VUS c.562G>A, p.A188T	MLH1/PMS2	Yes	40	4.7	No	Yes
Ohio 363005	None	MLH1 c.380G>A, p.R127K	MLH1 LOH		MLH1/PMS2	Yes	65	2.2	No	No
Ohio 363002	None	MLH1 c.178C>T, p.Q60X	MLH1 LOH		MLH1/PMS2	Yes	41	8.7	No	Yes
Ohio 458519	None	MSH2 c.1363del, p.E455Kfs*4	MSH2 c.2038C>T, p.R680X		MSH2/MSH6	Insufficient tumor	75	1.7	No	No
Ohio 500016	None	MSH2 c.2038C>T, p.R680X	MSH2 LOH		MSH2/MSH6	Yes	54	3.7	No	No
Ohio 500158	None	MLH1 c.100G>A, p.E34K	MLH1 LOH		None	Yes	60	1.6	No	No
Ohio 365597	None	MLH1 c.1614G>A, p.W538X	MLH1 LOH	PMS2 c.1239delA, p.D414Tfs*34	MLH1/PMS2	Yes	52	5.6	No	Yes
Ohio 509819	None	MLH1 c.298C>T, p.R100X	MLH1 LOH	Ultramutated tumor. MSI was detected on NGS.	MLH1 (weak)/PMS2	No	62	2.3	No	No
Ohio 460740	None	MLH1 c.545+3A>G	MLH1 LOH		MLH1/PMS2	Yes	48	2.8	No	Yes
Ohio 369991	MLH1 VUS c.1202G>A, p.S401N	MLH1 c.991G>T, E331X	MLH1 LOH		MLH1/PMS2	Yes	56	5.6	No	Yes
Ohio 362927	MLH1 promoter polymorphism homozygous c.-93G>A	MLH1 c.979C>T, p.Q327X	MLH1 LOH	MSH6 c.3261dupC, p.F1088Lfs*5	MLH1/PMS2	Yes	80	0.8	No	No
Ohio 501210	None	MLH1 c.1039-1G>C	MLH1 LOH		MLH1/PMS2	Yes	50	4.7	No	Yes
Ohio 503316	None	MLH1 loss	MLH1 loss		MLH1/PMS2	Yes	70	1.6	No	Yes
Ohio 507121	POLE VUS c.1280C>T, p.A427V	MLH1 c.790+5G>C	MLH1 LOH	Ultramutated tumor	MLH1/PMS2	Yes	73	1.2	No	No
Ohio 506462	None	MLH1 c.790+1G>A	MLH1 LOH		MLH1/PMS2	Yes	38	12.2	No	Yes
Ohio 509252	Monoallelic NTHL1 c.859C>T, p.Q287X	MSH2 c.1202T>A, p.L401X	MSH2 LOH		MSH2/MSH6	Yes	41	8.2	No	Yes
Ohio 365150	None	MSH2 c.34delG, p.E12Rfs*52	MSH2 c.1013G>T, p.G338V	PMS2 c.861_864del, p.R287Sfs*19, PMS2 c.1489G>A, p.G497S, PMS2 c.915C>T, p.L305L	MSH2/MSH6	Yes	53	2.2	No	No
Ohio 455812	None	MSH6 c.402dup, p.D135X	MSH6 c.260+1758G>A		MSH2 (weak)/MSH6	Yes	64	1.3	No	No
Ohio 501036	None	MLH1 c.1165del, p.R389Gfs*12	MLH1 c.1934_1938del, p.N645Sfs*17		MLH1/PMS2	Yes	46	3	No	Yes
Ohio 507469	None	MLH1 c.2024_2032del, p.S675_S677del	MLH1 LOH		MLH1/PMS2	Yes	49	2.7	No	Yes
Ohio 451366	None	MLH1 c.199G>A, p.G67R	MLH1 LOH		PMS2	Yes	69	3.6	No	Yes
Ohio 426966	None	MSH6 c.718C>T, p.R240X	MSH6 c.3261dupC, p.F1088Lfs*5		MSH2 (weak)/MSH6	Yes	46	6	No	Yes
Ohio 367119	None	MSH2 c.731dup, p.L244Ffs*12	MSH2 c.2228C>T, p.S743L		MSH2/MSH6	Yes	64	1.4	No	No
Ohio 456141	RPS20 whole gene deletion	MLH1 c.730_731delinsAA	MLH1 LOH		MLH1/PMS2	Yes	62	1.5	No	Yes
Ohio 408421	None	MLH1 c.1219C>T, p.Q407X	MLH1 LOH		MLH1/PMS2	Yes	55	4.4	No	Yes
Ohio 366298	Biallelic MUTYH c.536A>G, p.Y179C; c.1187G>A, p.G396D	MLH1 c.677G>A, p.R226Q	MLH1 LOH		MLH1/PMS2	Yes	49	11.8	No	Yes
Ohio 453625	None	MLH1 c.1975C>T, p.R659X	MLH1 LOH		MLH1/PMS2	Yes	68	1.3	No	No
Ohio 406765	None	MSH2 translocation (chr2:47648895 and chr5:15843665)	MSH6 partial deletion of exon 5 (chr2:48030647 to 48030693)	MSH6 c.3312del, p.F1104Lfs*11, MSH6 c.3261dup, p.F1088Lfs*5	MSH2/MSH6	Yes	54	14.9	No	Yes
Ohio 501631	None	MSH2 c.1861C>T, p.R621X	MSH2 c.1276G>A, p.G426R		MSH2/MSH6	Yes	72	1.2	No	Yes
Ohio 502086	None	MLH1 c.790+1G>A	Loss of heterozygosity		MLH1/PMS2	Yes	78	1	No	No
Ohio 448651	None	MSH2 c.1865C>T, p.P622L	MSH2 c.1662-2A>G		MSH2/MSH6 (weak)	Yes	40	8	No	Yes
Ohio 403206	None	MSH2 c.1204C>T, p.Q402X	MSH2 c.1759+1G>A	MSH6 c.521G>A, p.R174K, MSH6 c.2938G>A, p.E980K	MSH2/MSH6	Yes	70	1.9	No	No
Ohio 458098	None	MLH1 c.306+1G>T	MLH1 c.790+6T>G		MLH1/PMS2	Yes	37	10.7	No	Yes
Ohio 460539	CHEK2 c.349A>G, p.R117G	MSH2 c.2377C>T, p.Q793X	MSH2 LOH		MSH2/MSH6 (equivocal)	Yes	76	0.7	No	No
Ohio 461004	None	MSH6 c.3656C>T, p.T1219I	MSH6 c.3261del, p.F1088Sfs*2	MLH1 c.1348del, p.D450Ifs*41	MSH2 (weak)/MSH6	Yes	52	2.4	No	Yes
Ohio 458212	None	MSH2 c.2408_2409del, p.T803Sfs*5	MSH2 LOH		MSH2/MSH6	Yes	74	1.1	No	No
Ohio 453220	None	MLH1 c.2271A>C, p.*757Yext*3	MLH1 LOH		MLH1/PMS2	Yes	34	6.2	No	Yes
Ohio 456005	RAD51D c.955C>T, p.Q319X, monoallelic MUTYH c.536A>G, p.Y179C	MLH1 c.45_48del, p.V16Tfs*19	MLH1 LOH		MLH1/PMS2	Yes	53	4	No	Yes
Ohio 511687	MSH2 VUS c.2041C>G, p.Q681E	MLH1 c.1A>C	MLH1 LOH	MLH1 c.1489del, p.R497Gfs*11	MLH1/PMS2	Yes	57	2.1	No	No
Ohio 503824	None	MSH2 c.1861C>T, p.R621X	MSH2 c.388C>T, p.Q130X		MSH2/MSH6	Yes	69	1.4	No	No
Ohio 500692	None	MSH6 c.3261del, p.F1088Sfs*2	MSH6 whole gene deletion	EPCAM and MSH2 whole gene deletions	MSH2/MSH6	Yes	65	2.8	No	No
Ohio 507164	PMS2 VUS c.1218A>G, p.L406L	MLH1 c.2054C>A, p.S685Y	MLH1 LOH		MLH1/PMS2	Yes	61	2.9	No	No
Ohio 504282	None	MLH1 c.890_891insT, p.E297Dfs*10	MLH1 LOH		MLH1/PMS2	Yes	74	1.2	No	No
Ohio 366301	None	MSH2 exon 1-8 deletion	MSH2 exon 1-8 deletion		MSH2/MSH6	Yes	73	1.2	No	No
Ohio 451319	None	MLH1 c.1731G>A, p.S577S	MLH1 LOH		MLH1/PMS2	Yes	71	1.9	No	No
Ohio 456969	None	MLH1 c.1459C>T, p.R487X	MLH1 LOH	MLH1 c.588del, p.K196Nfs*6, MSH2 c.1048C>A, p.L350I	MLH1/PMS2	Yes	56	2.3	No	No
Ohio 432727	None	MLH1 c.991G>T, p.E331X	MLH1 LOH		MLH1/PMS2	Yes	74	1.1	No	No
Ohio 510859	None	MLH1 c.677+5G>A	MLH1 c.1489del, p.R497Gfs*11		MLH1/PMS2	Yes	68	1.3	No	No
Ohio 456109	None	MLH1 c.298C>T, p.R100X	MLH1 LOH		MLH1/PMS2	Yes	27	10.4	No	Yes
Ohio 366535	APC VUS c.295C>T, p.R99W	MLH1 c.2248_2253dup, p.Y750_K751dup	MLH1 LOH		PMS2	Yes	40	4.2	No	Yes
Ohio 146265	None	MLH1 c.95T>A, p.I32N	MLH1 LOH		MLH1 (weak)/PMS2 (weak)	Yes	59	2.8	No	Yes
Ohio 404766	None	MLH1 c.1039-2A>C	MLH1 LOH		MLH1/PMS2	Yes	66	2.1	No	No
Ohio 429813	MLH1 likely benign c.791-1159T>G	MLH1 loss	MLH1 loss		MLH1/PMS2	Yes	62	2.5	No	No
Ohio 510846	None	MSH2 c.832G>T, p.E278X	MSH2 c.1447G>T, p.E483X	Hypermutated tumor	MSH2/MSH6	Yes	44	7.9	No	Yes
Ohio 418889	None	MLH1 c.298C>T, p.R100X	MLH1 LOH	MSH2 c.687delA, p.A230Lfs*16, PMS2 c.1605T>C, p.S535S	MLH1/PMS2	Yes	65	1.2	No	Yes
LOH; loss of heterozygosity, VUS; variant of uncertain significance
1MLH1 methylation explains absence of MLH1/PMS2
